1  
2  
3  
4  
5  
6  
7  
8  
9  
10  
11  
12  
13  
14  
15  
16  
17  
18  
19  
20  
21  
22  
23  
24  
25  
26

### **Caterpillars on a phytochemical landscape**

Matthew L. Forister<sup>1,2</sup>, Su'ad Yoon<sup>1,2</sup>, Casey S. Philbin<sup>2,3</sup>, Craig D. Dodson<sup>2,3</sup>, Bret Hart<sup>4</sup>, Joshua G. Harrison<sup>5</sup>, Oren Shelef<sup>6</sup>, James A. Fordyce<sup>7</sup>, Zachary H. Marion<sup>8</sup>, Christopher C. Nice<sup>9</sup>, Lora A. Richards<sup>1,2</sup>, C. Alex Buerkle<sup>5</sup>, and Zach Gompert<sup>10</sup>

<sup>1</sup> Department of Biology, Program in Ecology, Evolution and Conservation Biology, University of Nevada, Reno, NV 89557, USA

<sup>2</sup> Hitchcock Center for Chemical Ecology, University of Nevada, Reno, NV 89557, USA

<sup>3</sup> Department of Chemistry, University of Nevada, Reno, NV 89557, USA

<sup>4</sup> Department of Biochemistry, University of Nevada, Reno, NV 89557, USA

<sup>5</sup> Department of Botany and Program in Ecology, University of Wyoming, Laramie, WY 82071, USA

<sup>6</sup> Department of Natural Resources, Institute of Plant Sciences, Volcani Center, Agricultural Research Organization, Rishon LeZion, Israel

<sup>7</sup> Department of Ecology and Evolutionary Biology, University of Tennessee, Knoxville, TN 37996, USA

<sup>8</sup> Department of Ecology, University of Canterbury, Christchurch, New Zealand

<sup>9</sup> Department of Biology, Population and Conservation Biology Program, Texas State University, San Marcos, TX 78666, USA

<sup>10</sup> Department of Biology, Utah State University, Logan, UT 84322, USA

Author for correspondence: Matthew L. Forister, +1 (775) 784-6770, email: [forister@gmail.com](mailto:forister@gmail.com)

27

## 28 **Summary**

29

- 30 • Modern metabolomic approaches that generate more comprehensive phytochemical profiles  
31 than were previously available are providing new opportunities for understanding plant-animal  
32 interactions. Specifically, we can characterize the phytochemical landscape by asking how many  
33 individual compounds affect herbivores and how compounds covary among plants.
- 34 • Here we use the recent colonization of alfalfa (*Medicago sativa*) by the Melissa blue butterfly  
35 (*Lycaeides melissa*) to quantify primary and secondary plant metabolites and the performance of  
36 caterpillars as affected by both individual compounds and suites of covarying phytochemicals.
- 37 • We find that survival, development time and adult weight are all associated with variation in a  
38 large number of compounds, including biomolecules associated with plant cell function as well  
39 as putative anti-herbivore action. The dimensionality of the plant-insect interface is high, with  
40 clusters of covarying compounds in many cases encompassing divergent effects on different  
41 aspects of caterpillar performance.
- 42 • Individual compounds with the strongest associations tend to be secondary metabolites,  
43 including alkaloids, phenolic glycosides and saponins. The saponins are represented in our data  
44 by more than 25 individual compounds with beneficial and detrimental effects on caterpillars,  
45 which highlights the value of metabolomic data as opposed to approaches that rely on total  
46 concentrations within defensive classes.

47

48 **Keywords:** *Lycaeides melissa*, *Medicago sativa*, metabolomics, plant defense, specialization

49

50

## 51 Introduction

52

53 One of the conceptual pillars of trophic ecology is the idea that herbivores must overcome the  
54 barrier of plant secondary chemistry before extracting the nutrients necessary for growth and  
55 reproduction (Feeny *et al.*, 1992). The success of this idea is reflected in areas of research that  
56 include coevolution (Agrawal *et al.*, 2012), ecological specialization (Dyer, 1995), and nutrient  
57 flow in ecosystems (Olson, 1963). In most cases, progress has been made by chemical ecologists  
58 focusing on small subsets of the secondary metabolites produced by plants and consumed by  
59 herbivores. The focus on a few charismatic molecules or classes of compounds, such as  
60 furanocoumarins (Berenbaum, 1983) or cardiac glycosides (Zalucki *et al.*, 2001), was at least in  
61 part necessitated by early methods in natural products chemistry that were targeted and not easily  
62 optimized for the discovery of large suites of co-occurring primary and secondary metabolites  
63 (Maag *et al.*, 2015; Dyer *et al.*, 2018). As technological limitations have dissipated, the  
64 opportunity now exists for a deeper understanding of the challenges faced by herbivores, with  
65 the possibility of discovering, among other things, novel compounds and synergistic interactions  
66 among compounds (Prince & Pohnert, 2010; Richards *et al.*, 2010; Sardans *et al.*, 2011). More  
67 generally, an important task is to quantify the phytochemical dimensionality of the antagonistic  
68 interaction between plants and herbivores, with an eye towards understanding constraints on the  
69 evolution of both players (Fordyce & Nice, 2008; Macel *et al.*, 2010) and predicting the  
70 formation of new plant-herbivore interactions (Erbilgin, 2018). Here we use the example of a  
71 specialized herbivore and a novel host plant to investigate the phytochemical landscape from the  
72 perspective of developing caterpillars.

73 The Melissa blue butterfly, *Lycaeides melissa*, specializes on larval host plants in the pea  
74 family (Fabaceae), primarily in the genera *Astragalus* and *Lupinus*. Within the last 200 years, *L.*  
75 *melissa* has colonized introduced alfalfa, *Medicago sativa* (Fabaceae), at least twice and  
76 probably multiple times (Chaturvedi *et al.*, 2018), forming a heterogeneous patchwork of  
77 association throughout the range of the butterfly in western North America. *M. sativa* is a  
78 suboptimal host, relative to native hosts that have been examined, and populations of the  
79 butterfly that persist on *M. sativa* show evidence of loss of preference for native hosts (Forister *et*  
80 *al.*, 2012), reduced caterpillar performance on native hosts, and a slight increase in ability to  
81 develop on the suboptimal novel host (Gompert *et al.*, 2015). The genetic architecture of host

82 use in this system is known to be polygenic and characterized by loci with conditionally neutral  
83 (host-specific) effects (Gompert *et al.*, 2015). What is needed next is an understanding of how  
84 many independent or covarying phytochemical compounds have consequential effects on  
85 caterpillars eating the novel host. For example, will the trajectory of further local adaptation by  
86 *L. melissa* to *M. sativa* be a matter of evolving the ability to detoxify one or a large number of  
87 compounds? We would also like to know how key compounds covary among individual plants,  
88 which should help us understand the puzzle faced by ovipositing females encountering an array  
89 of co-occurring *M. sativa* chemotypes. Here we use a common garden approach (to minimize  
90 non-genetic phenotypic variation among plants) and caterpillars individually reared in a  
91 controlled environment to address these questions while describing the effects of metabolomic  
92 variation in *M. sativa* on *L. melissa*.

93

## 94 **Materials and Methods**

### 95 **Plants and caterpillars**

96

97 Plants used in this project were grown at the University of Nevada, Reno, Main Station  
98 experimental farm. The common garden was planted in 2016 with seeds collected the previous  
99 year from 45 plants (previously studied by Harrison *et al.* (Harrison *et al.*, 2018)) growing in a  
100 fallow field in north-western Nevada on the western edge of the Great Basin Desert. The focal  
101 butterfly, *L. melissa*, was present in the source field but has not yet colonized the university farm  
102 where experimental plants were grown. The 45 maternal plants each contributed 15 offspring to  
103 a randomized grid design in the common garden, irrigated with broadcast sprayers in 2016 and  
104 drip in 2017, without supplemental fertilization. Out of each maternal family, a single plant was  
105 randomly selected for use in the rearing experiment reported here as a way to capture as much  
106 genetic and phenotypic variation as possible.

107 On 17 and 18 July 2017, a total of 45 *L. melissa* females were collected from an alfalfa-  
108 associated population near Verdi, NV, and confined to oviposition arenas (500 mL plastic cups)  
109 in groups of three with host plant leaves and supplied with Gatorade on mesh lids. After three  
110 days, eggs were removed from leaves, pooled, and kept at room temperature until hatching, at  
111 which time caterpillars were placed individually in Petri dishes (100 x 25 mm) with leaves of a  
112 particular *M. sativa* individual (which became the only plant from which they were fed

113 throughout the experiment). Ten caterpillars were assigned to each of the 45 experimental *M.*  
114 *sativa* plants (for a total of 450 independently-reared caterpillars) and kept in a growth chamber  
115 set to 25 C and a 12 hour light / 12 hour dark cycle. From each caterpillar we recorded survival  
116 to adult, date of eclosion (if successful) and adult weight to the nearest 0.01 mg on a Mettler  
117 Toledo XP26 microbalance.

118

## 119 Phytochemistry and plant traits

120

121 Metabolomic variation among individual plants was characterized with liquid chromatography–  
122 mass spectrometry (LC-MS, (Jorge *et al.*, 2016)) using leaves collected on a single day at the  
123 start of the rearing experiment. Dried, ground leaves (10 mg) were extracted in 2 mL of 70%  
124 aqueous ethanol and injected into an Agilent 1200 analytical high performance liquid  
125 chromatograph paired with an Agilent 6230 Time-of-Flight mass spectrometer via an  
126 electrospray ionization source. Resulting chromatograms were analyzed using MassHunter  
127 Quantitative Analysis (v.B.06.00, Agilent, Santa Clara, CA); see electronic supporting  
128 information for additional phytochemical protocols. Major classes of compounds were identified  
129 using characteristic relative mass defects (Ekanayaka *et al.*, 2015). Leaf protein content was  
130 quantified with three replicates (~2 mg each) per plant using the Bicinchoninic acid assay (Pierce  
131 Biotechnology, Waltham, MA). Before grinding, five dried leaflets from each sample were  
132 weighed to the nearest 0.1 mg, scanned, and area was measured using ImageJ (v.1.52a); specific  
133 leaf area (SLA) was calculated as leaf area divided by dry mass. Finally, leaf toughness was  
134 measured on fresh material in the common garden, at the start of the experiment (mid-July, when  
135 leaves were also sampled for chemistry and protein) and at the end of the experiment (mid-  
136 August), from three leaves per plant at each date, with a penetrometer (Chatillon 516 Series)  
137 through the center of the middle leaflet, as in (Harrison *et al.*, 2018); the three leaves were  
138 selected haphazardly, avoiding the oldest and youngest leaves. The six leaf toughness  
139 measurements per plant were averaged for a single toughness measure used in analyses.

140

## 141 Analyses of plant traits and caterpillar performance

### 142 Overview

143

144 Our analytical strategy to understand the association between phytochemical variation and  
145 caterpillar performance followed two complementary paths, one focusing on dimension  
146 reduction and feature selection to produce relatively simple models, and the other on the  
147 estimation of effects of all individual compounds. For the first path, involving dimension  
148 reduction and feature selection, we utilized an approach developed for gene transcription studies  
149 that identifies groups or modules of correlated variables with hierarchical clustering (Langfelder  
150 & Horvath, 2008); after clustering, we reduced the number of independent variables by selecting  
151 among modules and other plant traits (specific leaf area, protein and leaf toughness) using lasso  
152 regression (Ogutu *et al.*, 2012). Selected modules (and other plant traits) were analyzed in  
153 Bayesian linear models that are useful in this context because they allowed us to quantify our  
154 confidence in the sign of effects (positive or negative) as continuous probabilities (as opposed to  
155 relying on arbitrary significance cutoffs). For the second analytical path, we utilized ridge  
156 regression (Ogutu *et al.*, 2012) to estimate effects for all compounds simultaneously, which  
157 allowed us to investigate the distribution of effects among compounds and classes of compounds.  
158 Both analytical paths incorporated cross-validation during the lasso and ridge regressions, and as  
159 a means of evaluating the predictive success of the Bayesian models. We also used  
160 randomization tests to compare the performance of modules and individual compounds with  
161 randomly-chosen suites of compounds.

162

### 163 Dimension reduction and feature selection

164

165 We chose an approach that reduces the number of independent variables while allowing us to  
166 learn something about the correlational structure of the data, specifically unsupervised  
167 hierarchical clustering as implemented in the `blockwiseModules` function of the WGCNA  
168 package (Langfelder & Horvath, 2008) in R (Team & R Development Core Team, 2016).  
169 Among the options in the pipeline, we used positive correlations among variables (“signed”  
170 network type), merge cut height at 0.25, and correlations raised to the power of five (which is  
171 where the scale free topology index reached a plateau). Through experimentation, we found that  
172 our results with LC-MS data were robust to variation in these choices, including the choice of  
173 signed or unsigned networks. After an initial round of clustering, we took a remaining 19  
174 unassigned compounds and put them through a second round of clustering (although the majority

175 of consequential compounds were identified in the first round). One output of the WGCNA  
176 procedure is the first eigenvector from each cluster of compounds, which reduced our number of  
177 predictor variables by a factor of ten. The resulting eigenvectors plus protein, SLA (specific leaf  
178 area) and leaf toughness were then put through the feature reduction step of lasso regression  
179 (Ogutu *et al.*, 2012), a penalized regression that allows beta coefficients to be constrained to zero  
180 (thus excluding variables). We used the `cv.glmnet` function of the `glmnet` package (Friedman *et*  
181 *al.*, 2016) with cross-validation during error reduction set to leave out one plant (and associated  
182 caterpillars) at each iteration. The variables selected by the lasso were then put into a Bayesian  
183 linear model to estimate coefficients and associated credible intervals using JAGS (version 3.2.0)  
184 run in R with the `rjags` package (Plummer & others, 2003). Two Markov chains were run for  
185 10,000 steps for each analysis (no burn in was required) and chain performance was assessed by  
186 plotting chain histories, and calculating the Gelman and Rubin convergence diagnostic and  
187 effective sample sizes (Gelman *et al.*, 1992; Brooks & Gelman, 1998). For all models,  
188 uninformative priors for the regression coefficients were modeled as a normal distribution with a  
189 mean of zero and variance of 100 (variance = 1/precision). We quantified our confidence in the  
190 sign of coefficients (positive or negative) as the fraction of the posterior samples that were less  
191 than zero (for coefficients with a median negative value) or greater than zero (for coefficients  
192 with a median positive value).

193 All analyses were done using the R statistical language (Team & R Development Core  
194 Team, 2016) on scaled (z-transformed) predictor variables, and both lasso and Bayesian models  
195 used binomial (for survival), Poisson (for development time) and Gaussian (for adult weight)  
196 errors. The latter two analyses (development time and adult weight) included sex as a factor.  
197 The analysis of development time also included adult weight as a covariate; while (reciprocally)  
198 the analysis of adult weight included development time as a predictor. These variables are  
199 negatively correlated (at -0.52), and they function as useful covariates of each other, allowing us  
200 to investigate the possibility of unique plant effects on weight gain and development time, which  
201 could not be discovered if, for example, these variables were combined into a single performance  
202 index.

203 The success of models developed with the dimension reduction and feature selection  
204 pipeline was judged in two ways. We used a cross-validation procedure in which we left out one  
205 plant (and associated caterpillars) in each iteration of the Bayesian model and then used the

206 estimated coefficients (for phytochemical variables and other plant traits) to predict the  
207 performance of the unobserved caterpillars. After 45 iterations (one for each plant), we  
208 calculated a simple correlation coefficient between the observed and predicted performance of  
209 caterpillars across plants. In addition, we repeatedly resampled the original LC-MS data to  
210 match the structure of the reduced set of predictor variables to ask to what extent randomly  
211 assembled modules could outperform the empirically-derived modules.

212

### 213 Individual compound effects

214

215 The second path of our two-part analytical strategy involved simultaneous estimation of the  
216 effects of all individual chemical compounds on caterpillar survival, development time and adult  
217 weight. For this approach, we again used penalized regression (in the glmnet package (Friedman  
218 *et al.*, 2016)), but this time with ridge regression (instead of lasso) which constrains beta  
219 coefficients to avoid variance inflation but does not eliminate variables. As with the analyses  
220 above, ridge regression was done using error structures appropriate to the specific response  
221 variables, and included additional covariates where possible (in models of development time and  
222 adult weight). The resulting coefficients associated with all individual compounds were  
223 examined as a second perspective on the modules examined in the first set of analyses, and were  
224 used to ask to what extent individual compound effects could be predicted by the degree to  
225 which they vary among individual plants as quantified with the simple coefficient of variation.  
226 To assess confidence in the results of ridge regressions, we used a bootstrap approach, repeatedly  
227 resampling the data and estimating coefficients 1000 times, noting the compounds whose  
228 bootstrap confidence intervals did or did not overlap zero (Delaney & Chatterjee, 1986). We  
229 also allowed for the discovery of interactions among compounds using penalized regression on  
230 all individual compounds and all pairwise interactions between compounds. For ease of  
231 interpretation, this final analysis of potential interactions used lasso (not ridge) regression, letting  
232 the coefficients for many of the individual compounds and pairwise interactions go to zero.

233

## 234 Results

235



236 Of the 450 caterpillars that started the experiment, 261 were reared to eclosion as adults (a  
237 mortality rate similar to previous work with this system (Gompert *et al.*, 2015)) on leaves from  
238 45 individual alfalfa plants that were characterized for protein, leaf toughness, specific leaf area  
239 and 163 individual metabolomic features (see Fig. 1 for variation among plants in caterpillar  
240 performance and a subset of plant traits, and Supporting Information Table S1 for a list of  
241 compounds). Hierarchical clustering identified 14 subsets (or modules) of compounds with  
242 generally low correlations among modules and high correlations within modules (see Supporting  
243 Information Figs. S1 and S2 for correlations within and among modules, and Fig. S3 for module  
244 variation among plants). The correlational structure of the phytochemical data is illustrated as an  
245 adjacency network in Fig. 2, where it can be seen that some modules (e.g., modules 1 and 2)  
246 contain a great diversity of compound types, while other modules are made up of more narrow  
247 classes (e.g. modules 7 and 8 are mostly saponins, a class of defensive secondary metabolites  
248 (Levin, 1976)). From the 14 eigenvectors summarizing variation in the modules, as well as the  
249 other plant traits, lasso regression produced a reduced set of potential predictors which were then  
250 used in Bayesian multiple regression models that included between seven and nine independent  
251 variables (Table 1). The models had reasonably high performance in leave-one-out cross-  
252 validation (correlations between observed and predicted values were between 0.50 and 0.59,  
253 Table 1), and also in resampling analyses (Supporting Information Fig. S4), where a small  
254 fraction (never more than 4%) of randomly-generated models exceeded the variance explained of  
255 the models reported in Table 1.

256 Variation among plants in the suites of covarying compounds had large effects on  
257 caterpillar performance: for example, the beta coefficient of -2.33 (on the log-odds scale)  
258 associated with module 3 corresponds to a reduction in mean survival from 0.58 to 0.12  
259 associated with a one unit change in variation associated with that phytochemical module (Table  
260 1; note that in Table 1 and elsewhere negative coefficients for development time are associated  
261 with fewer days, and thus can be thought of as potentially beneficial effects, in contrast to  
262 negative coefficients for survival and weight that are detrimental to caterpillars). The  
263 phytochemical predictor variables are eigenvectors from clustering analysis, and thus are not  
264 entirely straightforward to interpret, especially when the clustering analysis was itself based on  
265 z-transformed data. It is useful to note that our LC-MS data consists of peak areas divided by the  
266 peak of an internal standard, and again divided by the dry weight of the sample (thus, in total,

267 referred to as "relative abundance per dry weight"). Variation in these numbers reflects variation  
268 in concentrations within compounds (among plants), but care should be used in comparing  
269 among compounds because of different ionization responses relative to the standard (thus the use  
270 of z-transformation for among-compound analyses). Nevertheless, the effects reported in Table  
271 1 reflect real variation in suites of compounds, as can be seen in correlations between  
272 eigenvectors and individual compounds in Supporting Information Fig. S2, and in variation  
273 among plants in average z-scores in Fig. S3.

274 Modules included in multiple regression models frequently had common effects across  
275 response variables (e.g., the positive association of module 10 with both survival and adult  
276 weight), with the exceptions of module 11 that had a solitary effect on survival and module 6  
277 with an effect only on development time (although the probability of the latter having a negative  
278 effect was only 0.75). Specific leaf area had a negative effect on survival and adult weight, and  
279 the coefficients for specific leaf area (-0.31 for survival and -0.42 for weight) were of smaller  
280 magnitude than most phytochemical effects.

281 Module-based analyses (as in Table 1) focused on feature reduction with lasso regression;  
282 as a complementary analytical approach, we used ridge regression on all of the compounds  
283 (which estimates effects of individual compounds without excluding variables as in lasso  
284 regression). Analyses of individual compounds by ridge regression (Fig. 3) were broadly  
285 consistent with the strongest module-specific effects, as can be seen, for example, with module  
286 10 having positive effects on survival and adult weight in module analyses (Table 1) and in  
287 compound-specific analyses (Fig. 3). Similarly, the individual compounds in module 3 had  
288 negative compound-specific effects on survival (Fig. 3), and that module had the strongest  
289 negative effect on survival in the eigenvector-based analyses in Table 1. Not surprisingly, the  
290 larger modules (with a greater number of covarying compounds, including many primary  
291 metabolites) tended to have a more complex mix of positive and negative effects (for example,  
292 modules 1 and 2, Fig. 3). For ease of interpretation, the coefficients from compound-specific  
293 regressions of survival and development time (in Figs. 3 and 4) have been back-transformed to  
294 be on the scales of probability and days (respectively), and displayed as changes relative to  
295 intercepts. For example, a compound with a relatively large effect on survival in Fig. 3 could be  
296 associated with a one half percent (0.005) reduction in the probability of survival relative to  
297 average survival and while holding other compounds constant.

298 We also considered potential pairwise interactions among individual compounds, and  
299 found few interactions that passed the filter of the penalized regression (Supporting Information  
300 Table S2), at least relative to the large number of potential interactions. Saponins and alkaloids  
301 tended to be overrepresented in the interactions that were detected, and phenolic glycosides were  
302 involved in stronger negative interactions relative to other compounds (Fig. S5). We did not find  
303 evidence that more or less variable compounds had differential effects on caterpillars, although  
304 there was a trend towards both greater positive and greater negative effects being associated with  
305 less variable compounds (Fig. S6). We saw some variation among classes of compounds in their  
306 effects on caterpillars (Fig. 4). All classes included positive and negative effects, with saponins,  
307 alkaloids and phenolic glycosides including some of the stronger negative effects of individual  
308 compounds, while lipids and sterols tended towards positive associations with survival and  
309 development (Fig. 4).

310

## 311 **Discussion**

312

313 The results reported here represent a dissection of the phytochemical landscape facing a  
314 specialized insect herbivore attacking a novel host plant (Hunter, 2016). The phytochemical  
315 landscape is both physical, referring to variation in compounds among individual plants in a  
316 common garden, and hypothetical to the extent that effects of individual compounds on  
317 caterpillars are estimated, although compounds are of course not encountered in isolation. Our  
318 exploration of the phytochemical landscape facing *L. melissa* on *M. sativa* is necessarily a first  
319 draft based on a snapshot in time, and the implications of this are discussed further (below) in the  
320 context of within and among-population heterogeneity in the system. Nevertheless, models  
321 including suites of covarying compounds and other plant traits had predictive success and  
322 suggested different natural products affecting survival, development time and adult weight  
323 (performance measured as adult weight is a proxy for fecundity (Forister *et al.*, 2009)). Previous  
324 work with *M. sativa* and insect herbivores has focused on sapogenic glycosides (Levin, 1976),  
325 and a simple outcome from our study could have been that one or a small number of saponins  
326 have anti-herbivore properties that reduce fitness of our focal insect. Instead, we find large  
327 numbers of compounds with potentially consequential effects on caterpillars (Fig. 3), and the

328 effects of those compounds were greater than the effects of leaf toughness and specific leaf area  
329 (Carmona *et al.*, 2011).

330 The precise identification of specific compounds is perhaps not as important as the result  
331 that prominent classes of secondary metabolites, such as saponins and peptides, include  
332 compounds with both positive and negative effects. Positive effects of these compounds are  
333 potentially associated with feeding stimulation, as has been observed (along with other positive  
334 effects) for other specialist herbivores and plant toxins (Seigler & Price, 1976; Smilanich *et al.*,  
335 2016). Negative effects of saponins on insects potentially include disruption of hormone  
336 production (Chaieb, 2010), although exact modes of action on *L. melissa* will await further study.  
337 Although most of the individual compounds with strong effects appear to be secondary  
338 metabolites (including alkaloids and phenolic glycosides, as well as saponins and peptides), we  
339 also find both positive and negative effects associated with variation in certain primary  
340 metabolites (Fig. 4). For example, the larger detrimental effects of individual compounds on  
341 caterpillars include phospholipids (Fig. 2). These could be direct effects if a compound is  
342 suboptimal for development, or they could be associated with nutritional imbalance (Behmer,  
343 2009), such that too much of one nutrient makes it difficult for caterpillars to consume a  
344 balanced diet. It has been suggested that the presentation of unbalanced nutrition can be a kind  
345 of anti-herbivore strategy (Berenbaum, 1995). Although this possibility has not been thoroughly  
346 investigated in many systems with full metabolomic profiling, the idea that nutritional imbalance  
347 could be as important as direct toxicity suggests that we might update theories of the evolution of  
348 plant defense that were built on differential investment into simple categories of plant growth  
349 versus defense (Stamp, 2003).

350 The finding that our specialist herbivore is affected by a wide range of metabolites,  
351 primary and secondary, that vary greatly even within a single host population has implications  
352 for our understanding of heterogeneity in the system and for the course of local adaptation of the  
353 herbivore to the novel host. *Lycaeides melissa* typically colonizes weedy or feral patches of *M.*  
354 *sativa* on roadsides or integrated into natural communities, and previous work has documented  
355 dramatic variation among individual alfalfa locations (often in close proximity) in the extent to  
356 which they can support caterpillar development (Harrison *et al.*, 2016). Previous phytochemical  
357 data with a lower resolution was less successful in explaining that variation (Harrison *et al.*,  
358 2016), and the results reported here suggest that among patch variation could be explained by

359 future studies using metabolomic data as used here. The within-population complexity described  
360 in the current study combined with previous evidence for dramatic among-population variation  
361 in *M. sativa* suitability for the focal herbivore also raises the possibility that the novel host  
362 presents a multi-faceted and potentially ever-shifting target from the perspective of evolving  
363 butterfly populations. In particular, it is possible that *M. sativa* defense against a specialist  
364 herbivore might be realized through different combinations (within and among populations) of  
365 individually-acting compounds, thus making it unlikely for butterflies in any one population to  
366 possess an effective suite of alleles that improve fitness on the novel host. In this context, it is  
367 interesting to note that a molecular genetic dissection of caterpillar performance in this system  
368 found a large number (potentially hundreds) of individual loci associated with performance on  
369 *M. sativa*, yet evolution in populations associated with the novel host is primarily associated with  
370 a loss (through genetic drift) of the ability to eat a native host and only slight improvement in the  
371 ability to eat the novel host (Gompert *et al.*, 2015).

372 The correlational structure of the phytochemical variation that we observed has  
373 implications for the evolution of plant defense and the accumulation of insect herbivores on *M.*  
374 *sativa*. Specifically, correlations among modules should make it possible to hypothesize  
375 directions of least resistance for defense evolution. Compounds in module 9 had a negative  
376 effect on survival (Table 1), and module 9 negatively covaried with module 10 (Supporting  
377 Information Fig. S1), which itself had a positive association with caterpillar survival. Thus an  
378 increase in module 9 and an associated decrease in 10 would be beneficial for the plant, at least  
379 with respect to herbivory by our focal herbivore. Of course, most plants do not have the luxury  
380 of optimizing defense against a single herbivore, and it is easy to imagine that improvements in  
381 defense against one enemy could lead to increased attraction to another, especially given the  
382 diversity of effects even within major classes studied here, including saponins and phenolic  
383 glycosides. Compounds in the latter class (phenolics) were found to have strong positive and  
384 negative effects on assemblages of arthropods associated with the maternal plants from which  
385 seeds were collected to start the common garden used in the present study (Harrison *et al.*, 2018).

386 The results reported here raise a number of avenues for future exploration, including the  
387 apparent overrepresentation of both saponins and alkaloids in interactions with other compounds  
388 (Fig. S5). Relative mass defect (RMD) is a useful tool for the categorization of compounds, but  
389 it has limitations in complex mixtures; we are developing methods that use other data from high

390 resolution mass spectrometry to further refine categorization of *Medicago* metabolites. Also, in  
391 the present study, we have not attempted to separate constitutive and induced defenses (Jansen *et*  
392 *al.*, 2009) as the plants in the common garden were exposed to natural and continuous levels of  
393 herbivory. We also acknowledge that feeding under laboratory conditions is of course not  
394 natural, although we found in a previous study that genetic variants (in caterpillars) associated  
395 with success in laboratory feeding trials were at least partially predictive of genetic variation  
396 associated with alfalfa host use in the wild (Chaturvedi *et al.*, 2018). Thus it is clear that  
397 metabolomic data such as that analyzed here has the potential to both open up new avenues of  
398 conceptual development in plant-insect interactions and to link micro-evolutionary trajectories  
399 across hosts and herbivores.

400

#### 401 **Acknowledgements**

402

403 This work was supported by National Science Foundation grant DEB-1638793 to MLF and  
404 CDD, DEB-1638768 to ZG, DEB-1638773 to CCN, DEB-1638922 to SL and JAF, and DEB-  
405 1638602 to CAB; MLF was additionally supported by a Trevor James McMinn professorship.  
406 Thanks to Ian Wallace, the Hitchcock Center for Chemical Ecology and the P.I.G. group for  
407 discussion and expertise.

408

#### 409 **Author contributions**

410

411 MLF: designed experiment, conducted analyses, wrote first draft. SY: conducted experiment  
412 and contributed to experimental design. CSP, CDD, BH: generated and interpreted  
413 phytochemistry and protein data. MLF, JGH, OS: developed and maintained common garden.  
414 JAF, ZHM, CCN, LAR: contributed to analyses and experimental design. CAB, JAF, ZG, CCN:  
415 contributed to experimental design. All authors: contributed to writing.

416

#### 417 **References**

418

419 **Agrawal AA, Petschenka G, Bingham RA, Weber MG, Rasmann S. 2012.** Toxic  
420 cardenolides: chemical ecology and coevolution of specialized plant--herbivore interactions.

- 421 *New Phytologist* **194**: 28–45.
- 422 **Behmer ST. 2009.** Insect herbivore nutrient regulation. *Annual review of entomology* **54**.
- 423 **Berenbaum M. 1983.** Coumarins and caterpillars: a case for coevolution. *Evolution* **37**: 163–
- 424 179.
- 425 **Berenbaum MR. 1995.** Turnabout is fair play - secondary roles for primary compounds. *Journal*
- 426 *of Chemical Ecology* **21**: 925–940.
- 427 **Brooks SP, Gelman A. 1998.** General methods for monitoring convergence of iterative
- 428 simulations. *Journal of computational and graphical statistics* **7**: 434–455.
- 429 **Carmona D, Lajeunesse MJ, Johnson MTJ. 2011.** Plant traits that predict resistance to
- 430 herbivores. *Functional Ecology* **25**: 358–367.
- 431 **Chaieb I. 2010.** Saponins as insecticides: a review. *Tunisian Journal of Plant Protection* **5**: 39–
- 432 50.
- 433 **Chaturvedi S, Lucas LK, Nice CC, Fordyce JA, Forister ML, Gompert Z. 2018.** The
- 434 predictability of genomic changes underlying a recent host shift in Melissa blue butterflies.
- 435 *Molecular ecology*.
- 436 **Delaney NJ, Chatterjee S. 1986.** Use of the bootstrap and cross-validation in ridge regression.
- 437 *Journal of Business & Economic Statistics* **4**: 255–262.
- 438 **Dyer LA. 1995.** Tasty generalists and nasty specialists - antipredator mechanisms in tropical
- 439 lepidopteran larvae. *Ecology* **76**: 1483–1496.
- 440 **Dyer LA, Philbin CS, Ochsnerider KM, Richards LA, Massad TJ, Smilanich AM, Forister**
- 441 **ML, Parchman TL, Galland LM, Hurtado PJ, et al. 2018.** Modern approaches to study
- 442 plant–insect interactions in chemical ecology. *Nature Reviews Chemistry* **1**.
- 443 **Ekanayaka EAP, Celiz MD, Jones AD. 2015.** Relative mass defect filtering of mass spectra: a
- 444 path to discovery of plant specialized metabolites. *Plant Physiology* **167**: 1221–1232.
- 445 **Erbilgin N. 2018.** Phytochemicals as mediators for host range expansion of a native invasive
- 446 forest insect herbivore. *New Phytologist*.
- 447 **Feeny P, Rosenthal GA, Berenbaum MR. 1992.** The evolution of chemical ecology:
- 448 contributions from the study of herbivorous insects. *Herbivores: their interactions with*
- 449 *secondary plant metabolites*, **2**: 1–44.
- 450 **Fordyce JA, Nice CC. 2008.** Antagonistic, stage-specific selection on defensive chemical
- 451 sequestration in a toxic butterfly. *Evolution* **62**: 1610–1617.

- 452 **Forister ML, Nice CC, Fordyce JA, Gompert Z. 2009.** Host range evolution is not driven by  
453 the optimization of larval performance: the case of *Lycaeides melissa* (Lepidoptera:  
454 Lycaenidae) and the colonization of alfalfa. *Oecologia* **160**: 551–561.
- 455 **Forister ML, Scholl CF, Jahner JP, Wilson JS, Fordyce JA, Gompert Z, Narala D, Buerkle**  
456 **CA, Nice CC. 2012.** Specificity, rank preference and the colonization of a non-native host  
457 plant by the Melissa blue butterfly. *Oecologia* DOI: **10.10**.
- 458 **Friedman J, Hastie T, Simon N, Tibshirani R. 2016.** Lasso and Elastic-Net Regularized  
459 Generalized Linear Models. R-package version 2.0-5. 2016.
- 460 **Gelman A, Rubin DB, others. 1992.** Inference from iterative simulation using multiple  
461 sequences. *Statistical science* **7**: 457–472.
- 462 **Gompert Z, Jahner JP, Scholl CF, Wilson JS, Lucas LK, Soria-Carrasco V, Fordyce JA,**  
463 **Nice CC, Buerkle CA, Forister ML. 2015.** The evolution of novel host use is unlikely to be  
464 constrained by trade-offs or a lack of genetic variation. *Molecular Ecology* **24**: 2777–2793.
- 465 **Harrison JG, Gompert Z, Fordyce JA, Buerkle CA, Grinstead R, Jahner JP, Mikel S, Nice**  
466 **CC, Santamaria A, Forister ML. 2016.** The many dimensions of diet breadth:  
467 phytochemical, genetic, behavioral, and physiological perspectives on the interaction between  
468 a native herbivore and an exotic host. *PloS One* **11**: e0147971.
- 469 **Harrison JG, Philbin CS, Gompert Z, Forister GW, Hernandez-Espinoza L, Sullivan BW,**  
470 **Wallace IS, Beltran L, Dodson CD, Francis JS, et al. 2018.** Deconstruction of a plant-  
471 arthropod community reveals influential plant traits with nonlinear effects on arthropod  
472 assemblages. *Functional Ecology* **32**: 1317–1328.
- 473 **Hunter MD. 2016.** *The phytochemical landscape: linking trophic interactions and nutrient*  
474 *dynamics*. Princeton University Press.
- 475 **Jansen JJ, Allwood JW, Marsden-Edwards E, van der Putten WH, Goodacre R, van Dam**  
476 **NM. 2009.** Metabolomic analysis of the interaction between plants and herbivores.  
477 *Metabolomics* **5**: 150.
- 478 **Jorge TF, Mata AT, António C. 2016.** Mass spectrometry as a quantitative tool in plant  
479 metabolomics. *Phil. Trans. R. Soc. A* **374**: 20150370.
- 480 **Langfelder P, Horvath S. 2008.** WGCNA: an R package for weighted correlation network  
481 analysis. *BMC bioinformatics* **9**: 559.
- 482 **Levin DA. 1976.** The chemical defenses of plants to pathogens and herbivores. *Annual review of*



- 483 *Ecology and Systematics* **7**: 121–159.
- 484 **Maag D, Erb M, Glauser G. 2015.** Metabolomics in plant-herbivore interactions: challenges  
485 and applications. *Entomologia Experimentalis et Applicata* **157**: 18–29.
- 486 **Macel M, van Dam NM, Keurentjes JJB. 2010.** Metabolomics: the chemistry between ecology  
487 and genetics. *Molecular ecology resources* **10**: 583–593.
- 488 **Ogutu JO, Schulz-Streeck T, Piepho H-P. 2012.** Genomic selection using regularized linear  
489 regression models: ridge regression, lasso, elastic net and their extensions. In: BMC  
490 proceedings. S10.
- 491 **Olson JS. 1963.** Energy storage and the balance of producers and decomposers in ecological  
492 systems. *Ecology* **44**: 322–331.
- 493 **Plummer M, others. 2003.** JAGS: A program for analysis of Bayesian graphical models using  
494 Gibbs sampling. In: Proceedings of the 3rd international workshop on distributed statistical  
495 computing.
- 496 **Prince EK, Pohnert G. 2010.** Searching for signals in the noise: metabolomics in chemical  
497 ecology. *Analytical and bioanalytical chemistry* **396**: 193–197.
- 498 **Richards LA, Dyer LA, Smilanich AM, Dodson CD. 2010.** Synergistic effects of amides from  
499 two Piper species on generalist and specialist herbivores. *Journal of chemical ecology* **36**:  
500 1105–1113.
- 501 **Sardans J, Penuelas J, Rivas-Ubach A. 2011.** Ecological metabolomics: overview of current  
502 developments and future challenges. *Chemoecology* **21**: 191–225.
- 503 **Seigler D, Price PW. 1976.** Secondary compounds in plants: primary functions. *The American*  
504 *Naturalist* **110**: 101–105.
- 505 **Smilanich AM, Fincher RM, Dyer LA. 2016.** Does plant apparency matter? Thirty years of  
506 data provide limited support but reveal clear patterns of the effects of plant chemistry on  
507 herbivores. *New Phytologist* **210**: 1044–1057.
- 508 **Stamp N. 2003.** Out of the quagmire of plant defense hypotheses. *The Quarterly Review of*  
509 *Biology* **78**: 23–55.
- 510 **Team RDC, R Development Core Team R. 2016.** R: A Language and Environment for  
511 Statistical Computing. *R Foundation for Statistical Computing*.
- 512 **Zalucki MP, Brower LP, Alonso-M A. 2001.** Detrimental effects of latex and cardiac  
513 glycosides on survival and growth of first-instar monarch butterfly larvae *Danaus plexippus*

514 feeding on the sandhill milkweed *Asclepias humistrata*. *Ecological Entomology* **26**: 212–224.

515

516 **Figure legends** (also reproduced below individual figures)

517

518 **Fig. 1.** Variation among plants in caterpillar survival (a), development time (b) adult weight (c),  
519 three individual compounds (d-e) and two external plant traits, specific leaf area (g) and leaf  
520 toughness (h). The three example compounds shown here (out of the 163 assayed) were among  
521 the top five most influential compounds for survival, development time and adult weight: cpd. 9  
522 is an alkaloid with a negative association with survival, cpd. 94 (a peptide) has a negative  
523 association with development time, and cpd. 160 is a phospholipid with a negative association  
524 with adult weight. Individual plants in all panels are organized from left to right by decreasing  
525 caterpillar survival in the top panel (a). Standard errors are shown for panels b, c, g and h. The  
526 units for d-e are compound relative abundance per dry weight of sample; the units for specific  
527 leaf area are  $\text{cm}^2/\text{mg}$ , and grams/newton for leaf toughness.

528

529 **Fig. 2.** Illustration of correlational structure among compounds: each node in the network is a  
530 compound, and compounds are linked by a line if they are correlated among individual plants at  
531 0.5 or above (links among compounds in modules 12-14 represent weaker correlations, greater  
532 than 0.1; see main text for details). Two letter codes within nodes indicate compound classes, as  
533 explained in the legend. Colors of nodes correspond to membership in modules as determined by  
534 hierarchical cluster analysis; the color key to the 14 modules is shown in the lower left. Not shown are a  
535 small number of compounds with weak connections to all other compounds, including two compounds  
536 that were not included in any module (shown as module zero in Fig. 3).

537

538 **Fig. 3.** Effects of individual compounds on survival, development time and adult weight, as estimated by  
539 ridge regression (using binomial, Poisson and Gaussian models, respectively). The strength of effect for  
540 each compound is indicated by the horizontal extent of each bar, and compounds are grouped by modules  
541 (m1, m2, etc.); the order of compounds along the vertical axis is arbitrary within modules and fixed across  
542 columns. Orange colors indicate negative effects on survival, development and weight, while blue colors  
543 are positive effects (note that negative effects for development time correspond to fewer days, or more  
544 rapid development). The darker shades of orange and blue mark coefficients whose 95% confidence  
545 intervals did not overlap zero in 1,000 bootstrap samples. Values for survival and development time have

546 been back-transformed from units on the log-odds and log scales to units of probability and days to  
547 pupation, and are shown as changes from the mean or intercept values. For example, a negative (orange)  
548 survival coefficient of 0.005 means a one-half percent reduction in average probability of survival  
549 associated with variation in a particular compound. The fifteen compounds with the largest coefficients  
550 (by absolute value) and bootstrap intervals not overlapping zero are labelled by compound classes (see  
551 Fig. 2 for abbreviations) in each panel. Structural annotations are shown to the right for six compounds  
552 based on matches from the METLIN metabolomics database, as follows by compound number: 154  
553 (unidentified sterol); 9 (unidentified alkaloid); 60 (soyasaponin A3); 40 (unidentified saponin); 46  
554 (medicagenic acid 3-O-triglucoside); 45 (medinoside E). Those same compounds are identified in  
555 parentheses in the main panels next to the bars corresponding to their individual effects.

556

557 **Fig. 4.** Violin plots of compound-specific effects (coefficients from ridge regressions) summarized by  
558 chemical classes. Plots show median (black dot), interquartile range (box) and 95% confidence intervals  
559 (whiskers) surrounded by kernel density envelopes. Sample sizes for each category are shown above the  
560 top panel ("Other" includes 1 sugar, 2 pigments and 2 halogenated compounds). Categories are arranged  
561 from left to right based on the gradient of median positive to negative effects on survival.  
562 Coefficients for survival (a) and development time (b) have been back-transformed from the  
563 units of log-odds and log to probability and days to pupation, respectively, and shown as  
564 deviations from the mean or intercept value (as in Fig. 3). Note that negative effects for  
565 development time correspond to fewer days (more rapid development).

566

**Table 1** Results from Bayesian regressions of module eigenvectors and covariates predicting caterpillar survival, development time and adult weight (as binomial, Poisson, and Gaussian regressions, respectively, with corresponding units in log-odds, log number of days, and milligrams).

|            | Survival<br>coefficient (CI; prob.) | Development time<br>coefficient (CI, prob.) | Weight<br>coefficient (CI, prob.) |
|------------|-------------------------------------|---------------------------------------------|-----------------------------------|
| m2         | 0.37 (-1.87, 2.67; 0.63)            | -0.07 (-0.26, 0.12; 0.78)                   |                                   |
| m3         | -2.33 (-3.94, -0.72; >0.99)         |                                             | -2.33 (-4.87, 0.24; 0.96)         |
| m6         |                                     | -0.05 (-0.19, 0.09; 0.75)                   |                                   |
| m9         | -2.31 (-4.49, -0.15; 0.98)          | 0.064 (-0.11, 0.24, 0.78)                   |                                   |
| m10        | 2.54 (0.81, 4.23; >0.99)            |                                             | 3.56 (1.22, 5.84; >0.99)          |
| m11        | 2.01 (0.64, 3.42; >0.99)            |                                             |                                   |
| SLA        | -0.31 (-0.55, -0.08; >0.99)         |                                             | -0.42 (-0.78, -0.06; 0.99)        |
| Protein    | 0.061 (-0.16, 0.28; 0.71)           |                                             | 0.08 (-0.26, 0.42; 0.68)          |
| Tough.     | 0.036 (-0.17, 0.24; 0.36)           | -0.002 (-0.02, 0.02; 0.57)                  |                                   |
| Sex        | /                                   | 0.06 (0.02, 0.10; >0.99)                    | 1.10 (0.38, 1.83; >0.99)          |
| mg         | /                                   | -0.03 (-0.05, -0.01; >0.99)                 | /                                 |
| Days       | /                                   | /                                           | 1.10 (0.38, 1.83; >0.99)          |
| Intercept  | 0.34 (0.14, 0.53; >0.99)            | 3.48 (3.45, 3.52; >0.99)                    | 10.36 (9.81, 10.92; >0.99)        |
| Validation | 0.53                                | 0.59                                        | 0.50                              |

For each regression coefficient, numbers in parentheses are 95% credible intervals (the first two numbers) and the probability that the coefficient has the estimated sign (e.g., 0.63 for the m2 survival coefficient of 0.37 indicates a 63% probability that the m2 module has a positive effect on survival). Note that negative coefficients for development time indicate faster caterpillar development (fewer days) associated with variation in a particular compound. Modules (listed in the left column) are only shown if they were included in one of the three regressions following feature selection using lasso regression (see main text for additional details). Empty spaces in the Table appear if a particular module was selected through lasso regression for one or two analyses but not all three (m3, for example, was not selected by lasso regression for development time). Slash marks (/) indicate variables not considered for a particular analysis (e.g., sex, adult weight [mg] and development time [days] were not possible for the survival analysis because they are not observed on dead individuals). Values for “validation” shown in the last row are the correlation between observed and predicted values in cross-validation (Supporting Information Fig. S4).

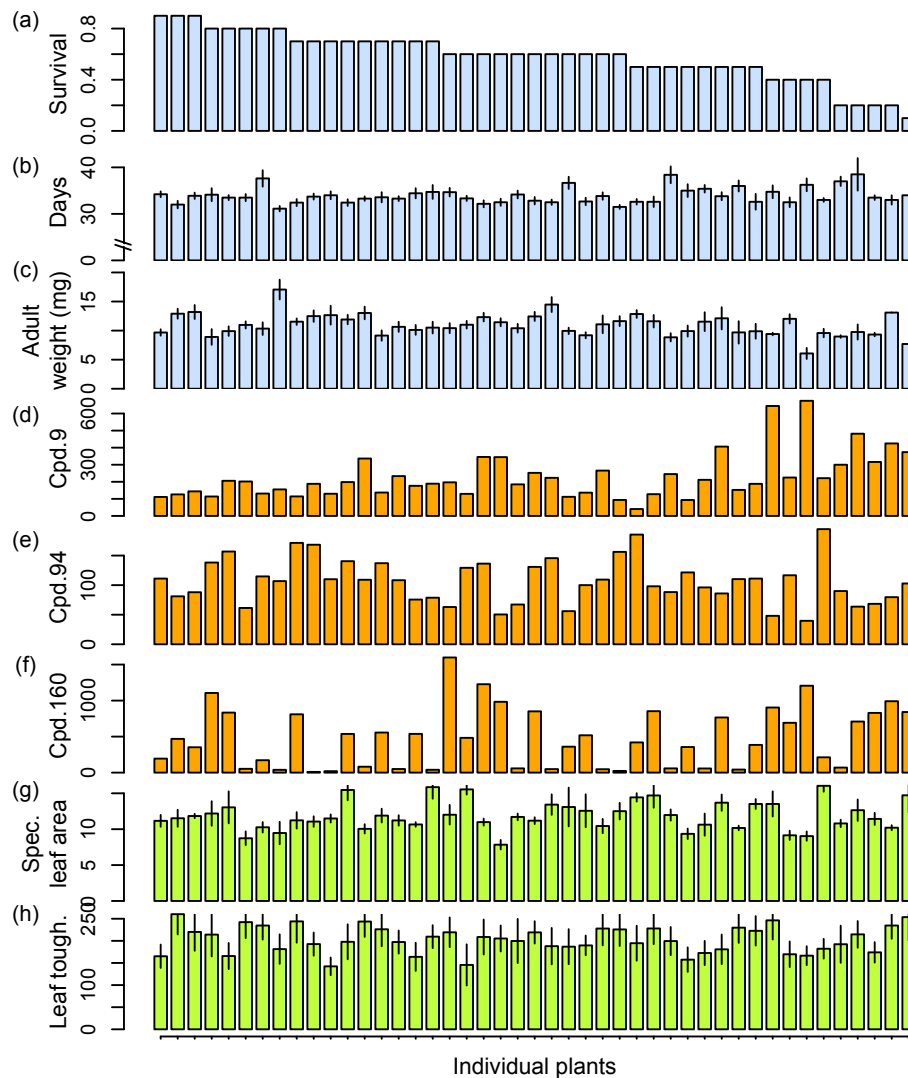

Fig. 1. Variation among plants in caterpillar survival (a), development time (b) adult weight (c), three individual compounds (d-e) and two external plant traits, specific leaf area (g) and leaf toughness (h). The three example compounds shown here (out of the 163 assayed) were among the top five most influential compounds for survival, development time and adult weight: cpd. 9 is a peptide with a negative association with survival, cpd. 94 (another peptide) has a negative association with development time, and cpd. 160 is a phospholipid with a negative association with adult weight. Individual plants in all panels are organized from left to right by decreasing caterpillar survival in the top panel (a). Standard errors are shown for panels b, c, g and h. The units for d-e are compound relative abundance per dry weight of sample; the units for specific leaf area are cm<sup>2</sup>/mg, and grams/newton for leaf toughness.

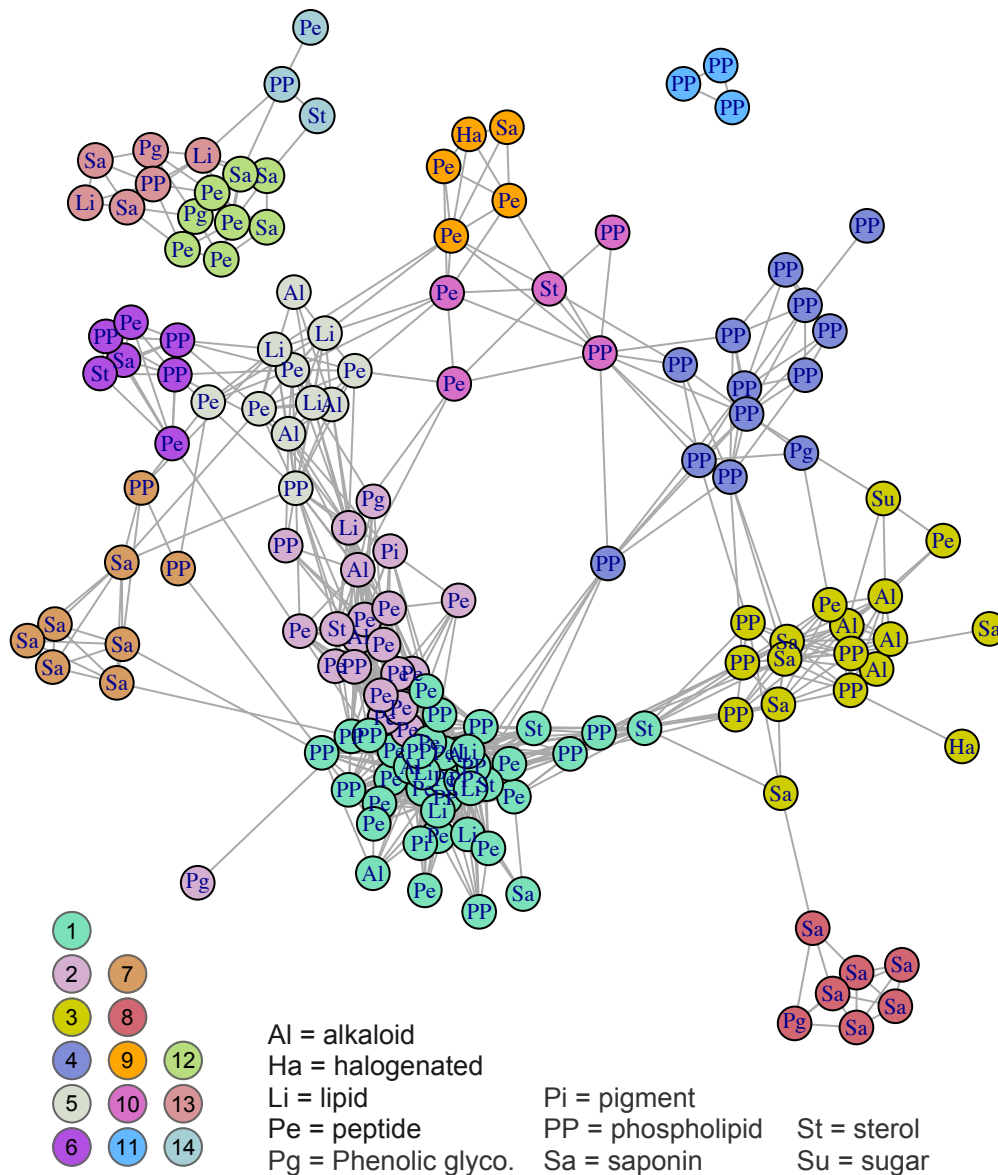

Fig. 2. Illustration of correlational structure among compounds: each node in the network is a compound, and compounds are linked by a line if they are correlated among individual plants at 0.5 or above (links among compounds in modules 12-14 represent weaker correlations, greater than 0.1; see main text for details). Two letter codes within nodes indicate compound classes, as explained in the legend. Colors of nodes correspond to membership in modules as determined by hierarchical cluster analysis; the color key to the 14 modules is shown in the lower left. Not shown are a small number of compounds with weak connections to all other compounds, including two compounds that were not included in any module (shown as module zero in Fig. 3).

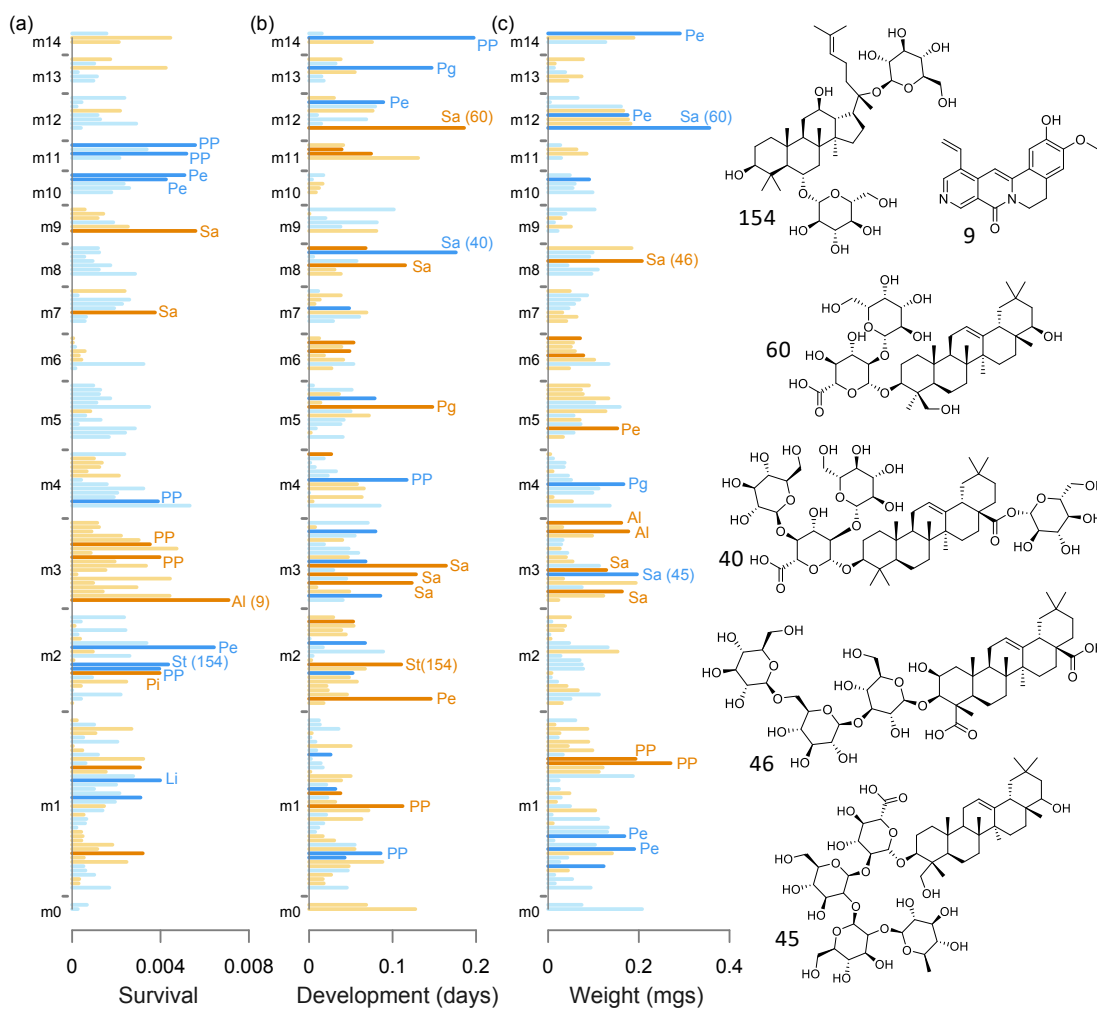

Fig. 3. Effects of individual compounds on survival, development time and adult weight, as estimated by ridge regression (using binomial, Poisson and Gaussian models, respectively). The strength of effect for each compound is indicated by the horizontal extent of each bar, and compounds are grouped by modules (m1, m2, etc.); the order of compounds along the vertical axis is arbitrary within modules and fixed across columns. Orange colors indicate negative effects on survival, development and weight, while blue colors are positive effects (note that negative effects for development time correspond to fewer days, or more rapid development). The darker shades of orange and blue mark coefficients whose 95% confidence intervals did not overlap zero in 1,000 bootstrap samples. Values for survival and development time have been back-transformed from units on the log-odds and log scales to units of probability and days to pupation, and are shown as changes from the mean or intercept values. For example, a negative (orange) survival coefficient of 0.005 means a one-half percent reduction in average probability of survival associated with variation in a particular compound. The fifteen compounds with the largest coefficients (by absolute value) and bootstrap intervals not overlapping zero are labelled by compound classes (see Fig. 2 for abbreviations) in each panel. Structural annotations are shown to the right for six compounds based on matches from the METLIN metabolomics database, as follows by compound number: 154 (unidentified sterol); 9 (unidentified alkaloid); 60 (soyasaponin A3); 40 (unidentified saponin); 46 (medicagenic acid 3-O-triglucoside); 45 (medinoside E). Those same compounds are identified in parentheses in the main panels next to the bars corresponding to their individual effects.

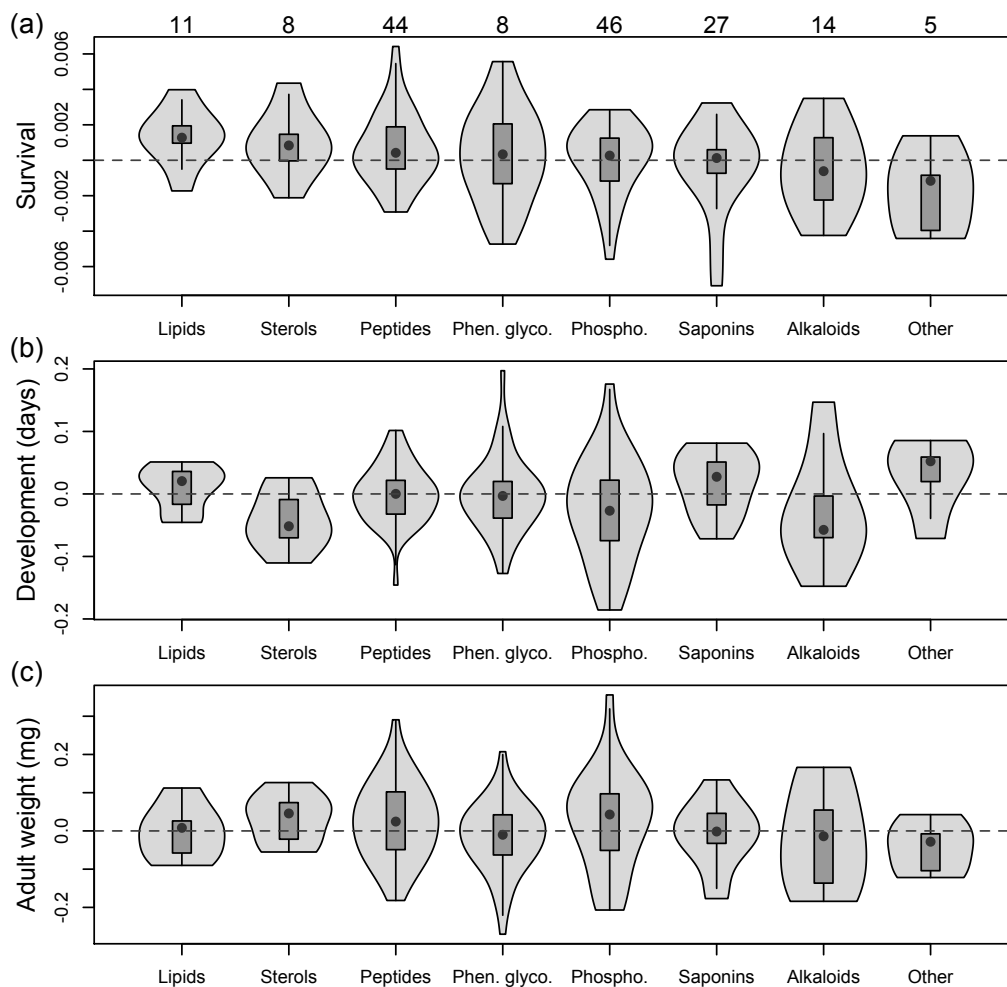

Fig. 4. Violin plots of compound-specific effects (coefficients from ridge regressions) summarized by chemical classes. Plots show median (black dot), interquartile range (box) and 95% confidence intervals (whiskers) surrounded by kernel density envelopes. Sample sizes for each category are shown above the top panel ("Other" includes 1 sugar, 2 pigments and 2 halogenated compounds). Categories are arranged from left to right based on the gradient of median positive to negative effects on survival. Coefficients for survival (a) and development time (b) have been back-transformed from the units of log-odds and log to probability and days to pupation, respectively, and shown as deviations from the mean or intercept value (as in Fig. 3). Note that negative effects for development time correspond to fewer days (more rapid development).
